# Supplementary material for: Dual-quenching NBD-based fluorescent probes for separate detection of H2S and Cys/Hcy in living cells
Source: Royal Society of Chemistry journal article supplement (doi:10.1039/c9ob01535c), 2019-01-01
Supplement: c9ob01535c1.pdf [file c9ob01535c1.pdf]

# Supporting Information

## Dual-quenching NBD-based fluorescent probes for separate detection of H<sub>2</sub>S and Cys/Hcy in living cells

Yaqing Jiang,<sup>a</sup> Xiuru Ji,<sup>b</sup> Changyu Zhang,<sup>a</sup> Zhen Xi,<sup>c</sup> Lu Sun<sup>b,\*</sup> and Long Yi<sup>a,c\*</sup>

<sup>a</sup>State Key Laboratory of Organic-Inorganic Composites and Beijing Key Laboratory of Energy Environmental Catalysis, Beijing University of Chemical Technology, Beijing 100029, China. E-mail: [yilong@mail.buct.edu.cn](mailto:yilong@mail.buct.edu.cn)

<sup>b</sup>Tianjin Key Laboratory on Technologies Enabling Development of Clinical Therapeutics and Diagnostics (Theranostics), School of Pharmacy, Tianjin Medical University, Tianjin 300070, China. E-mail: [sunlu@tmu.edu.cn](mailto:sunlu@tmu.edu.cn)

<sup>c</sup>State Key Laboratory of Elemento-Organic Chemistry and Department of Chemical Biology, National Pesticide Engineering Research Center (Tianjin), Collaborative Innovation Center of Chemical Science and Engineering (Tianjin), Nankai University, Tianjin, 300071, China.

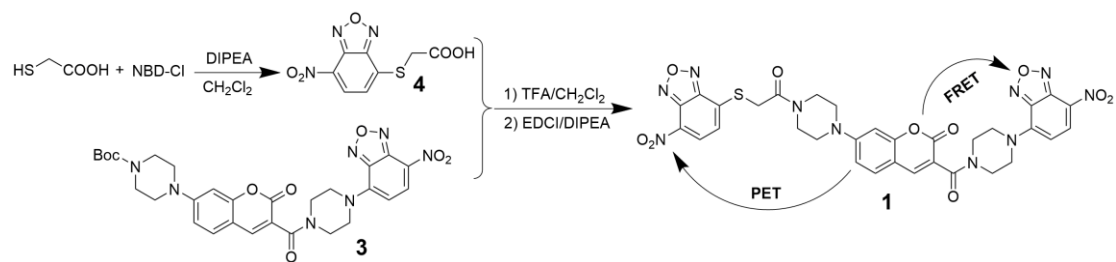

**Fig. S1** Synthetic route of probe **1**.

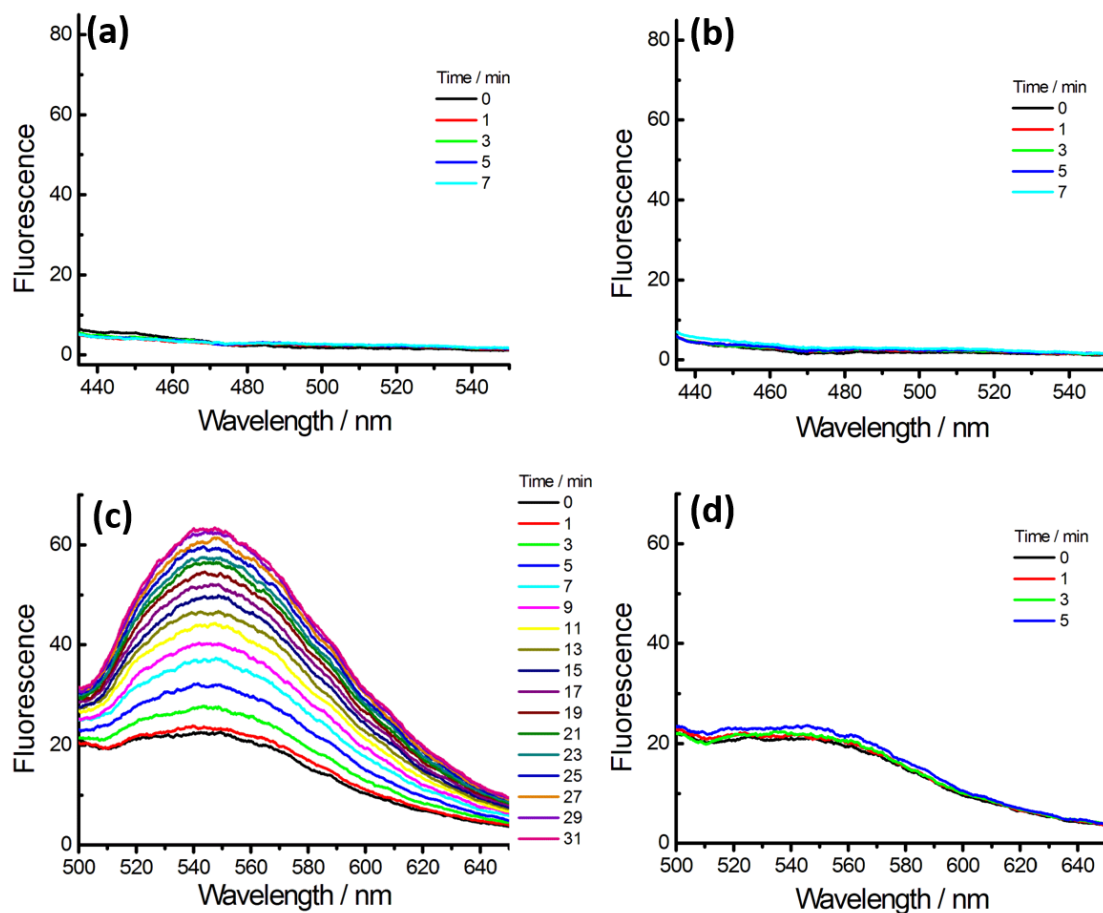

**Fig. S2** Time-dependent fluorescence spectra of probe **1** (1  $\mu\text{M}$ ) toward Hcy (100  $\mu\text{M}$ , a) and GSH (100  $\mu\text{M}$ , b) upon the excitation of 405 nm. Time-dependent fluorescence spectra of probe **1** (1  $\mu\text{M}$ ) toward Hcy (100  $\mu\text{M}$ , c) and GSH (100  $\mu\text{M}$ , d) upon the excitation of 470 nm.

| compound | Absorption/nm | $\epsilon/M^{-1}cm^{-1}$                 | Quantum Yield                             |
|----------|---------------|------------------------------------------|-------------------------------------------|
| <b>2</b> | 350, 480      | $9.76 \times 10^3$ , $11.11 \times 10^3$ | 0.0015 <sup>a</sup> , 0.0058 <sup>b</sup> |
| <b>6</b> | 390           | $13.76 \times 10^3$                      | 0.21 <sup>a</sup>                         |
| <b>8</b> | 480           | $23.92 \times 10^3$                      | 0.023 <sup>b</sup>                        |

<sup>a</sup>Excitation at 390 nm. <sup>b</sup>Excitation at 485 nm.

**Table S1** Optical properties of compounds **2**, **6** and **8** in PBS buffer.

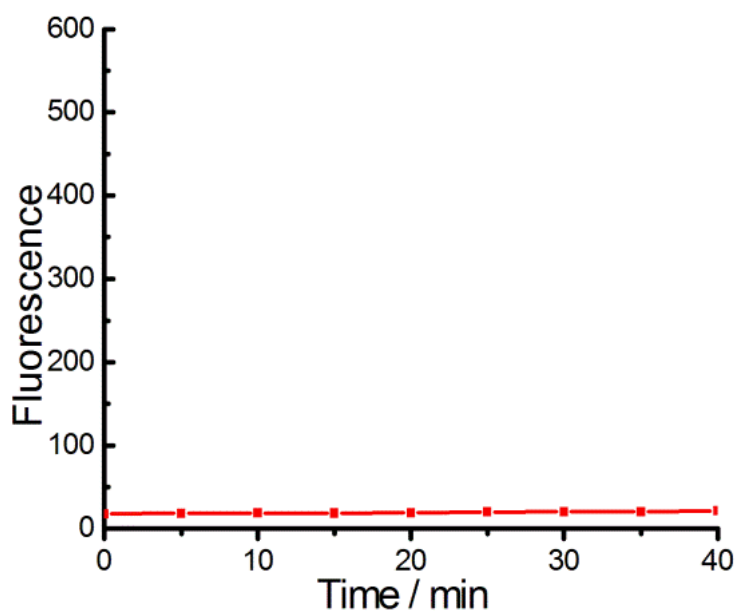

**Fig. S3** Emissions of probe **2** (1  $\mu$ M) at 455 nm within 40 min in PBS buffer.

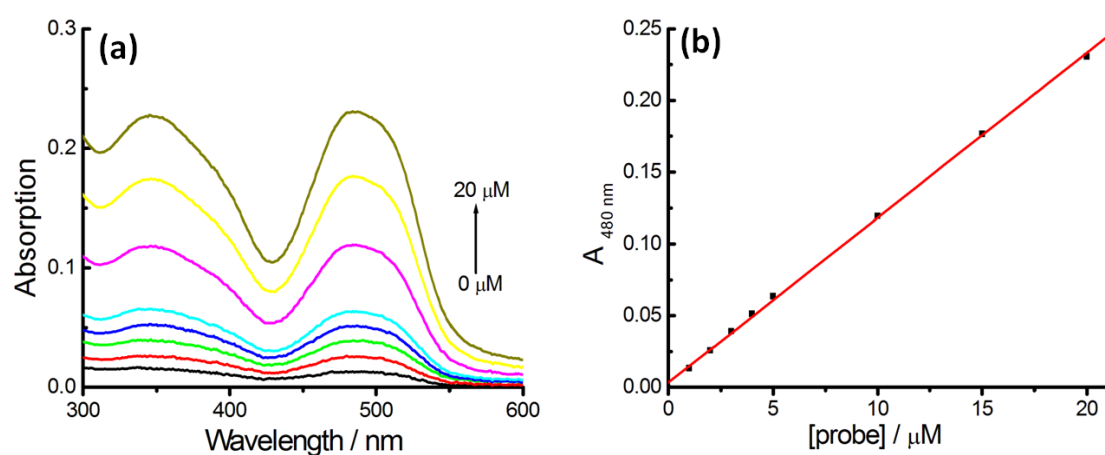

**Fig. S4** (a) Absorption profiles of probe **2** at different concentrations in PBS buffer. (b) The linear relationship of absorbance of probe **2** at 480 nm versus probe concentration.

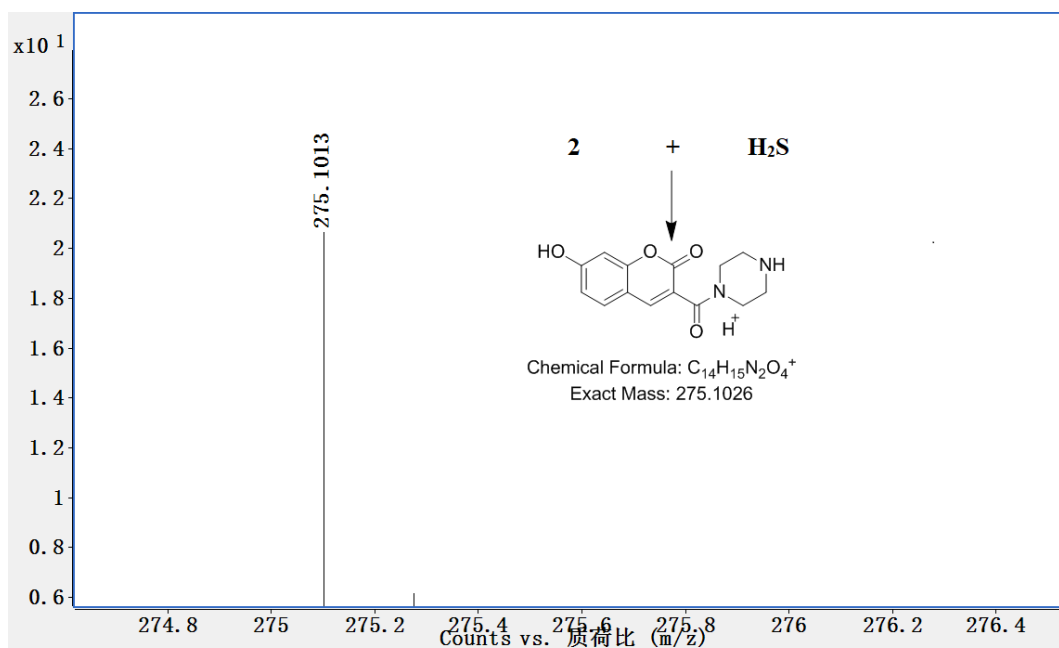

**Fig. S5** HRMS spectra of compound **6** from the reaction of **2** with  $H_2S$ . **2** (200  $\mu M$ ) was incubated with  $H_2S$  (2.5 mM) in PBS buffer (pH=7.4, 50 mM, 30%  $CH_3CN$ ) at room temperature for 1 h in microcentrifuge tube.

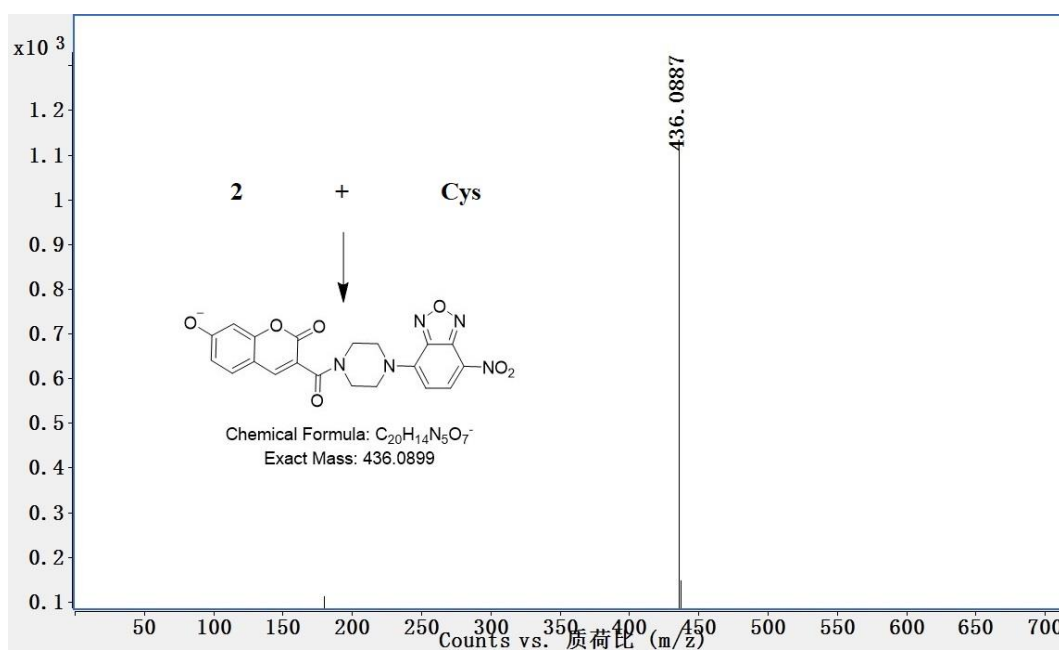

**Fig. S6** HRMS spectra of compound **7** from **2** and Cys. **2** (200  $\mu M$ ) was incubated with Cys (2.5 mM) in PBS buffer (pH=7.4, 50 mM, 30%  $CH_3CN$ ) at room temperature for 1 h in microcentrifuge tube.

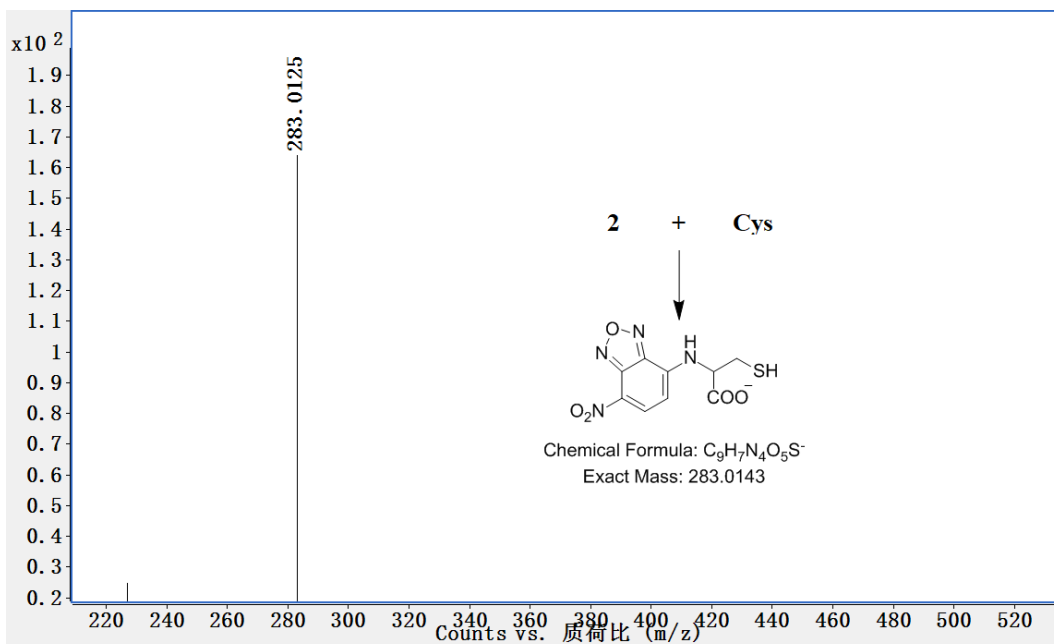

**Fig. S7** HRMS spectra of compound **8** from **2** with Cys. Under  $N_2$  protection, to a solution of **2** (10 mg, 0.017 mmol) in 2 mL  $CH_3CN$ , 2 mL degassed PBS and Cys (10 mg) were added one by one. This mixture was stirred for 4 h at room temperature and then characterized.

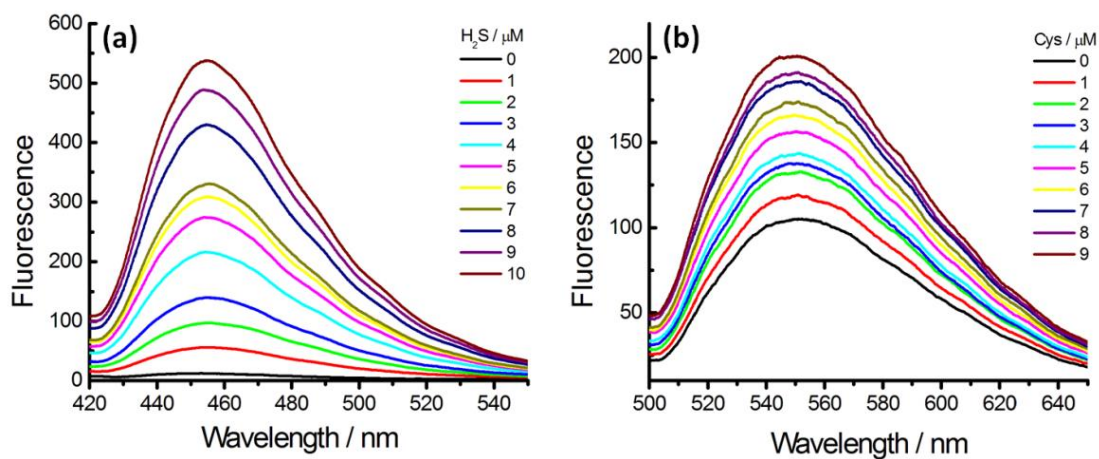

**Fig. S8** (a) Fluorescence spectra of probe **2** (1  $\mu M$ ) toward different concentrations of  $H_2S$  (0-10  $\mu M$ ) upon excitation of 405 nm. (b) Fluorescence spectra of probe **2** (1  $\mu M$ ) toward different concentrations of Cys (0-9  $\mu M$ ) upon excitation of 470 nm.

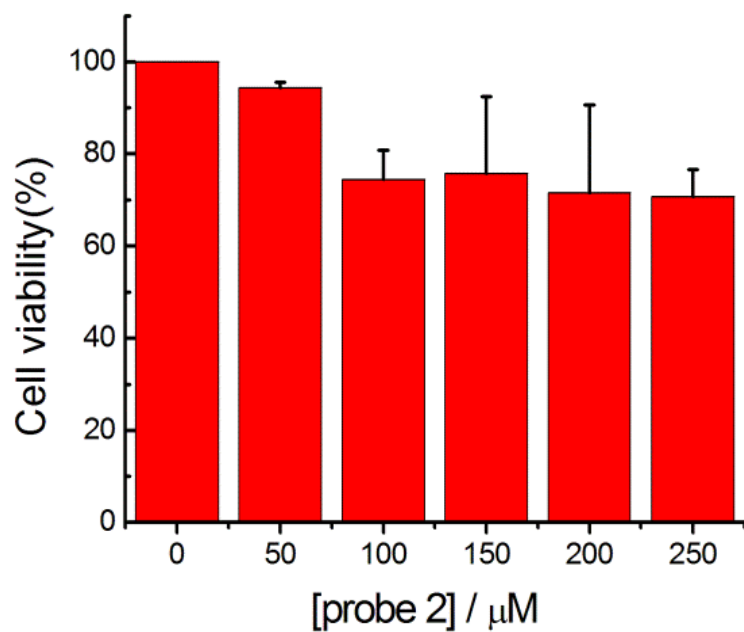

**Fig. S9** Cytotoxicity assessment of probe 2.

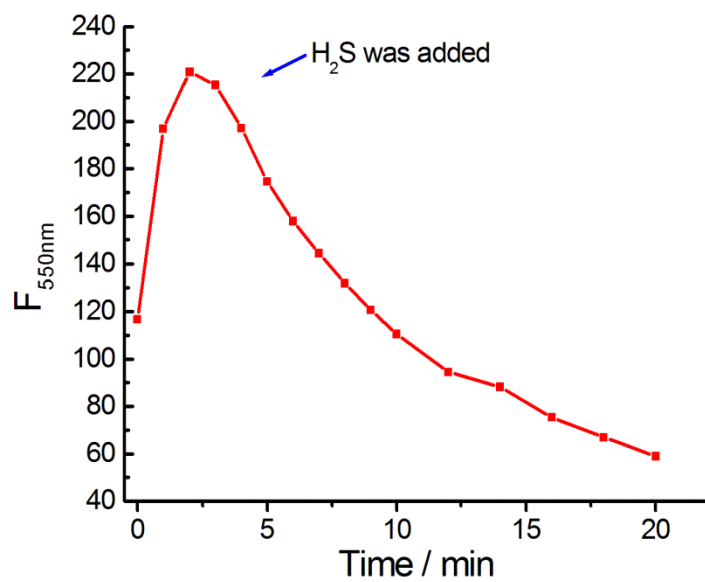

**Fig. S10** Emission of probe 2 in the presence of Cys and  $\text{H}_2\text{S}$ . 2 ( $1 \mu\text{M}$ ) was incubated with  $\text{H}_2\text{S}$  ( $100 \mu\text{M}$ ) for 4 min, then Cys ( $100 \mu\text{M}$ ) was added. Excitation: 470 nm.

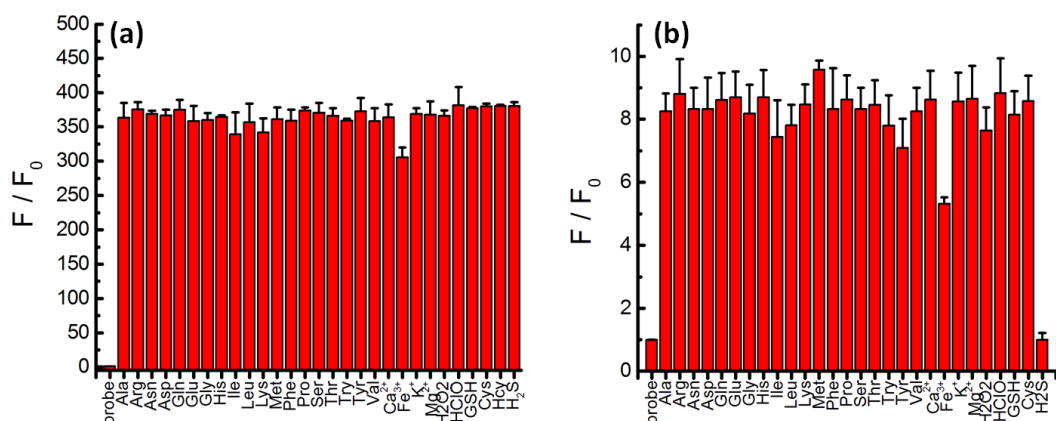

**Fig. S11** Relative fluorescence of **2** (1  $\mu\text{M}$ ) at (a) 455 nm toward different types of amino acids and biothiols in the presence of  $\text{H}_2\text{S}$ ; (b) 550 nm toward different types of amino acids and biothiols in the presence of Cys in PBS buffer. Excitation, (a) 405 nm; (b) 470 nm. All reactions were incubated for 30 min. Biothiols were all 100  $\mu\text{M}$ , and all other species were 1 mM.

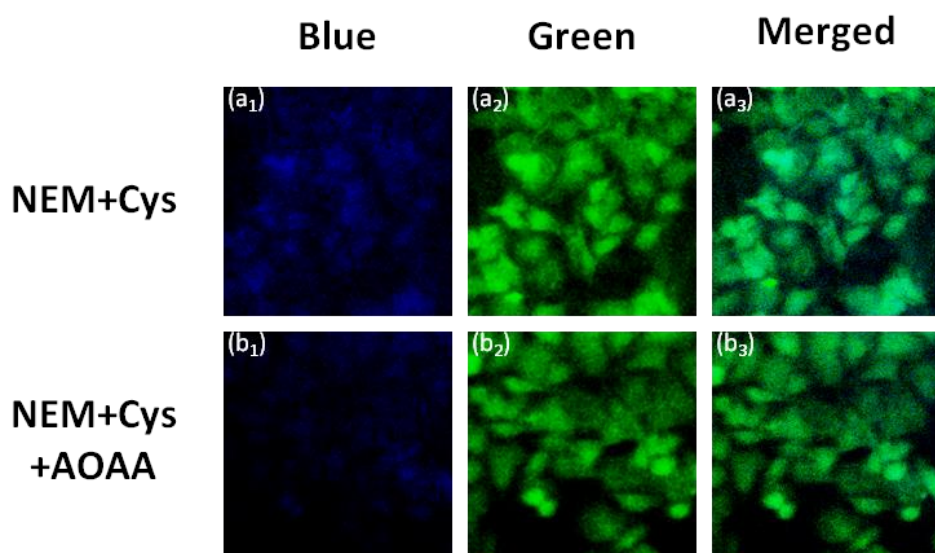

**Fig. S12** Fluorescence images of probe **2** for detection of Cys-induced  $\text{H}_2\text{S}$  in living cells. HeLa cells were incubated with (a) NEM, Cys, and probe **2** one by one; (b) NEM, AOAA (400  $\mu\text{M}$ ), Cys, and probe **2** one by one. Probe **2** was 5  $\mu\text{M}$ ; NEM was 1 mM; Cys was 500  $\mu\text{M}$ . The incubation time was 30 min, respectively. Emissions were collected at the green channel (500-550 nm) with 488 nm excitation and the blue channel (440-490 nm) with 405 nm excitation, respectively.

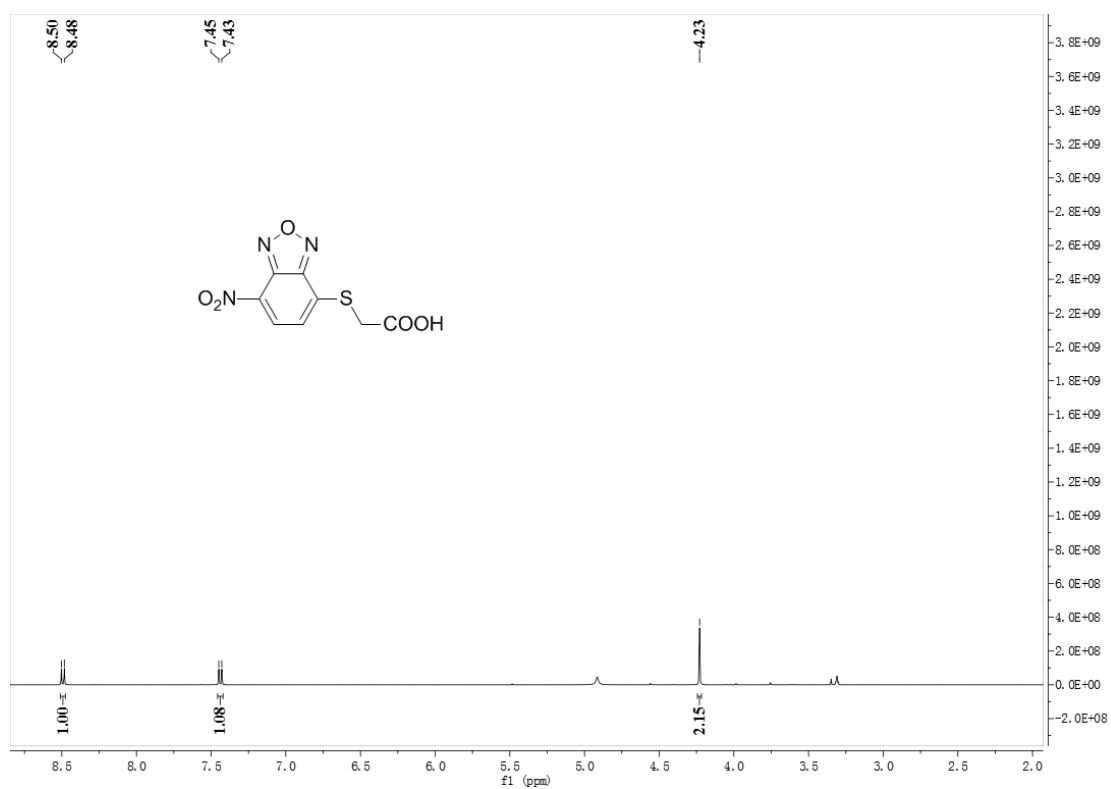

<sup>1</sup>H NMR spectrum of compound 4.

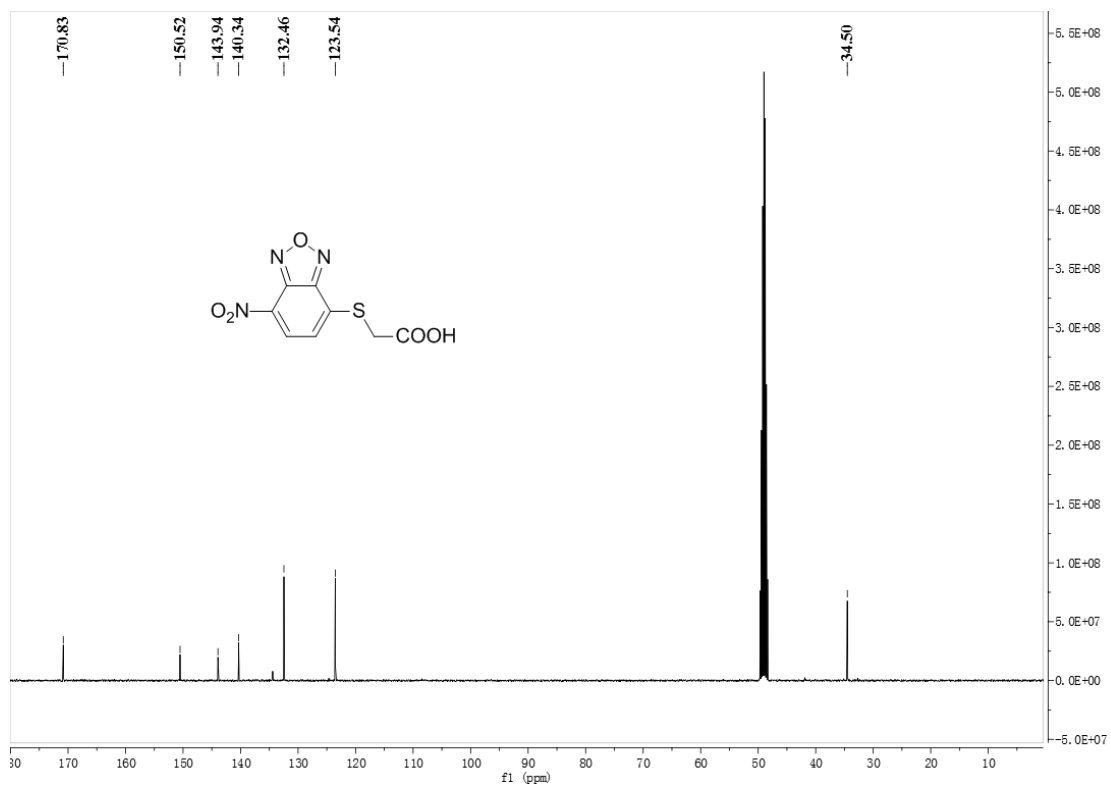

<sup>13</sup>C NMR spectrum of compound 4.



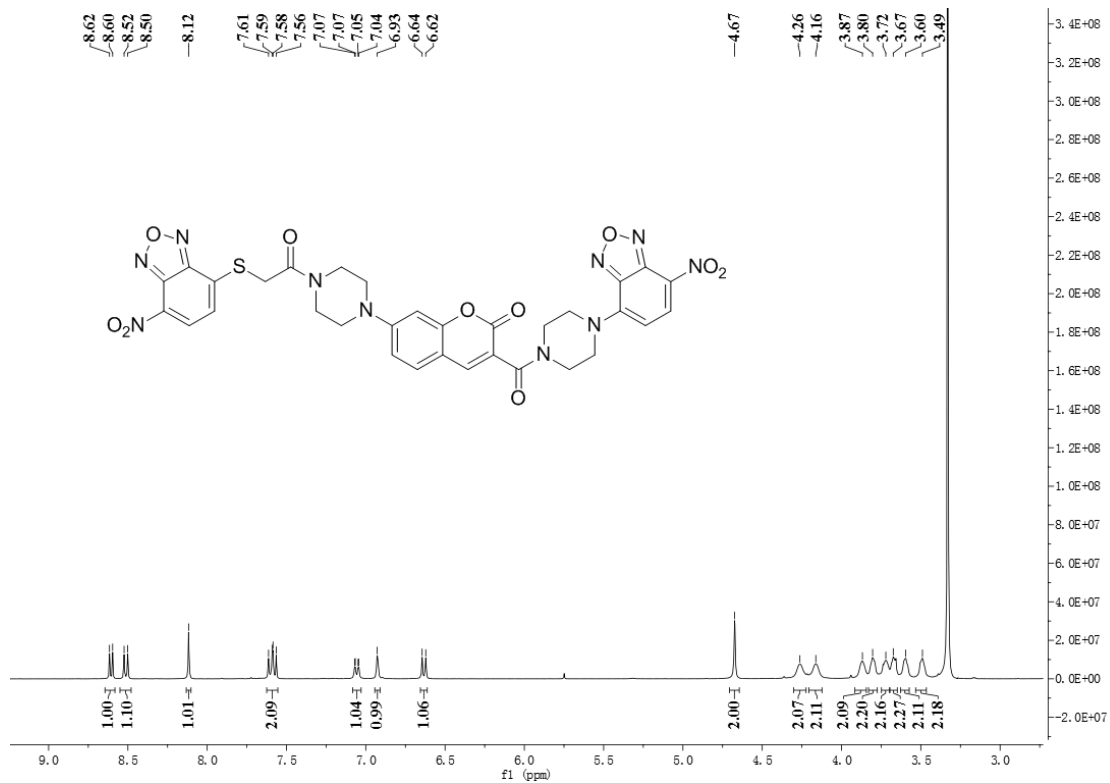

$^1\text{H}$  NMR spectrum of probe **1**.

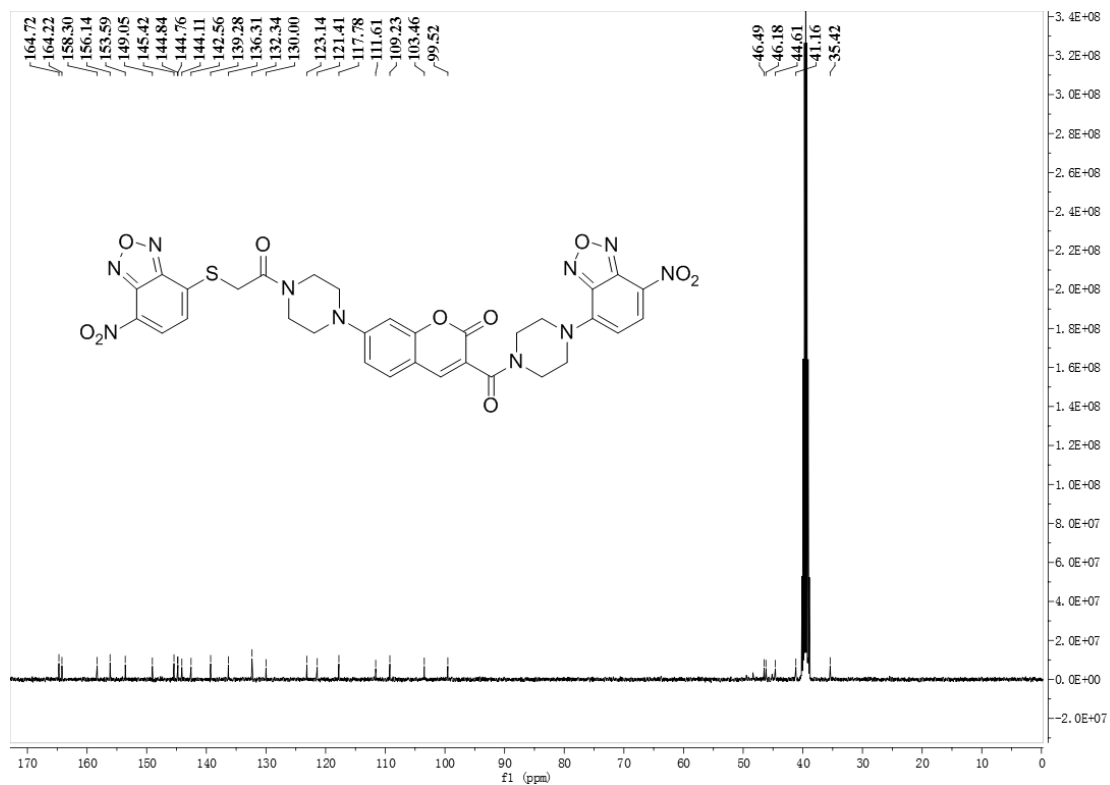

$^{13}\text{C}$  NMR spectrum of probe **1**.

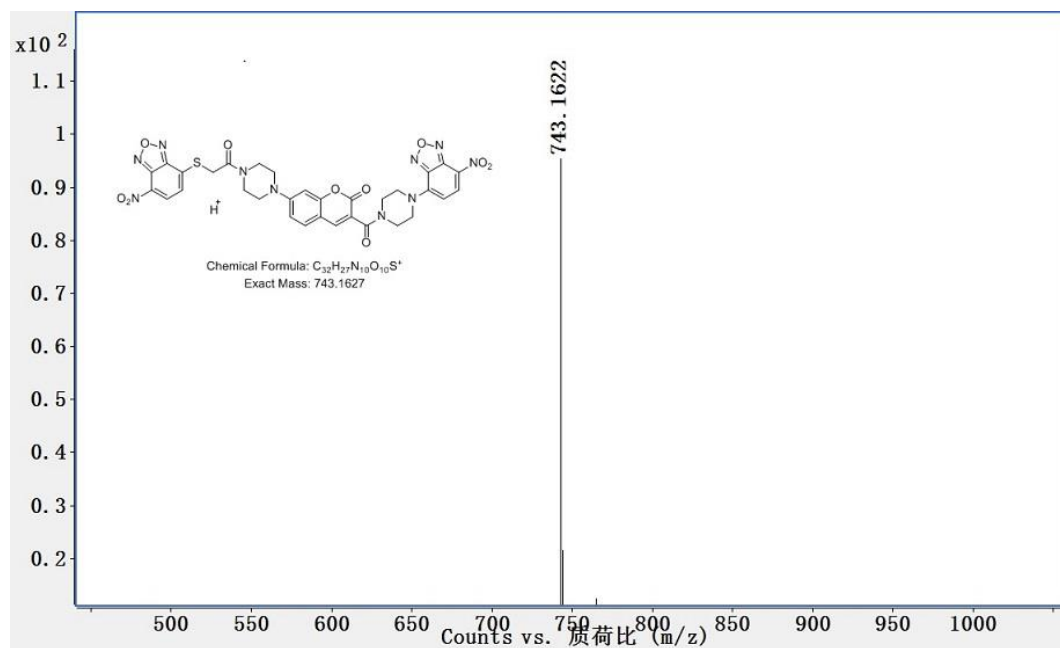

HRMS spectrum of probe 1.

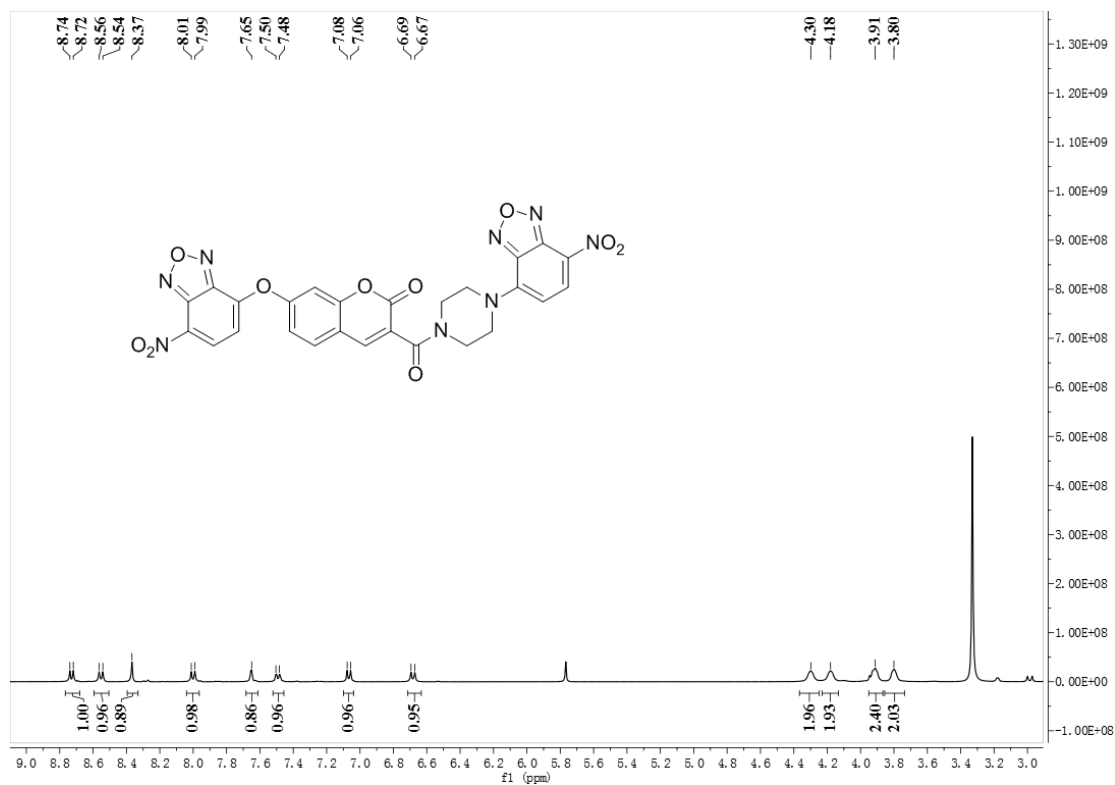

$^1H$  NMR spectrum of probe 2.

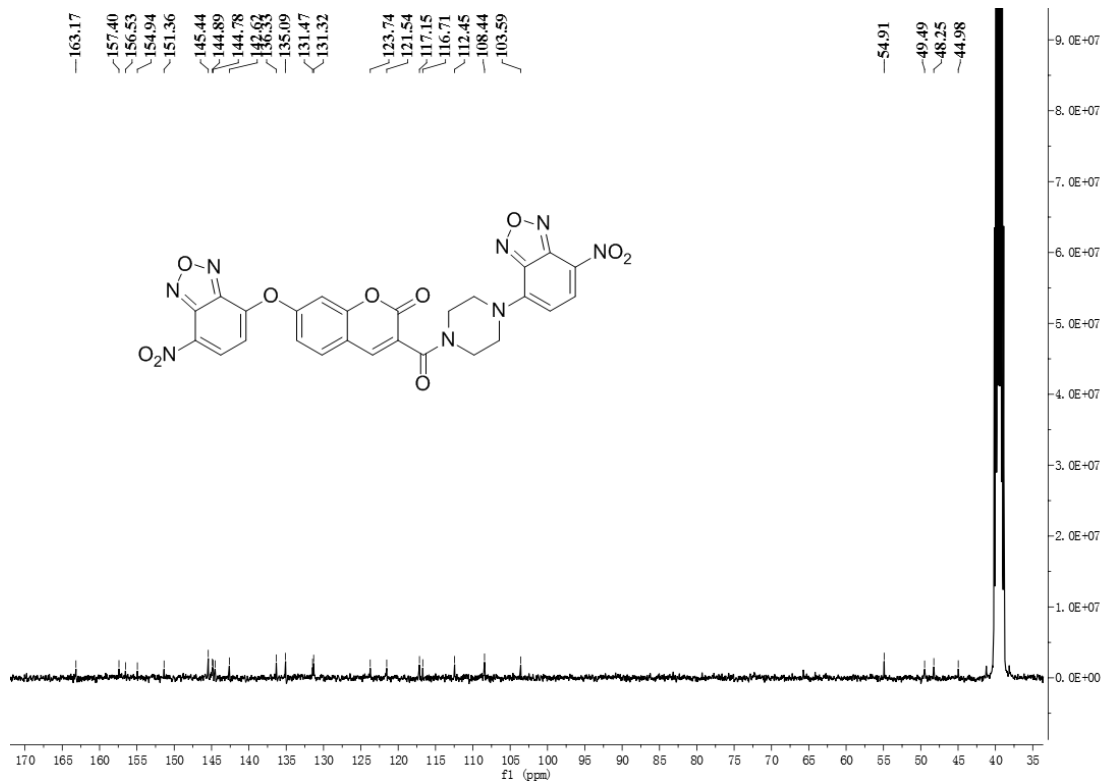

$^{13}\text{C}$  NMR spectrum of probe 2.

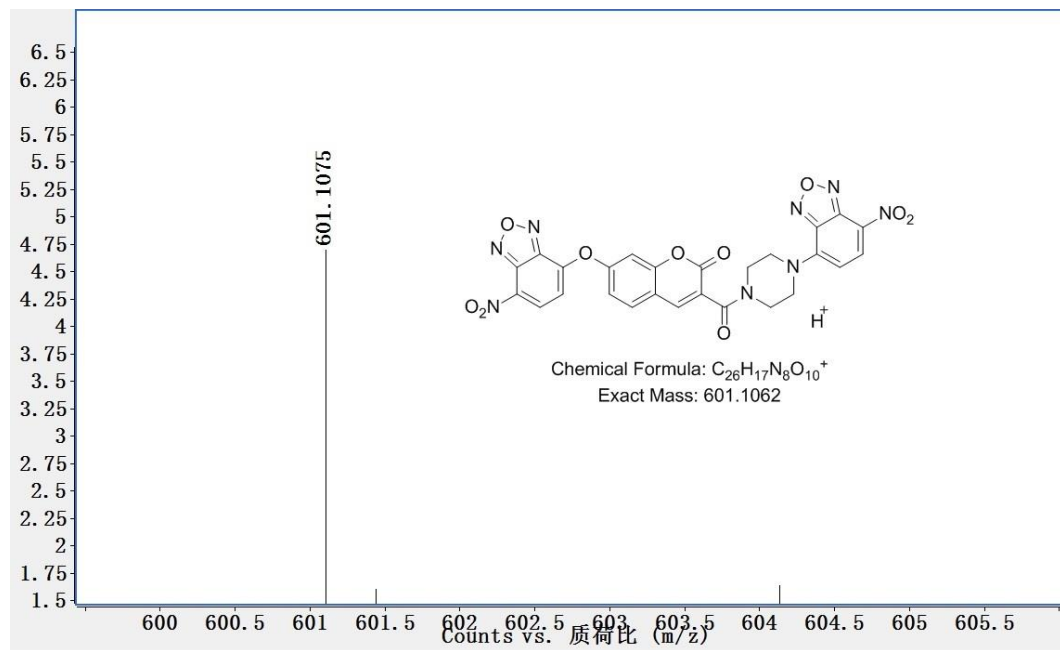

HRMS spectrum of probe 2.
